# Supplementary material for: Different iron sources to study the physiology and biochemistry of iron metabolism in marine micro-algae
Source: PubMed Central journal article supplement (PMC3905174; doi:10.1007/s10534-013-9688-1), 2013-11-27
Supplement: 10534_2013_9688_MOESM1_ESM.pdf [file 10534_2013_9688_MOESM1_ESM.pdf]

SUPPLEMENTARY MATERIAL  
BIOMETALS

DIFFERENT IRON SOURCES TO STUDY THE PHYSIOLOGY AND BIOCHEMISTRY  
OF IRON METABOLISM IN MARINE MICRO-ALGAE

Hugo Botebol<sup>a§</sup>, Robert Sutak<sup>b§</sup>, Pierre-Louis Blaiseau<sup>c</sup>, François-Yves Bouget<sup>a</sup>, Jean-Michel Camadro<sup>c</sup> and Emmanuel Lesuisse<sup>c</sup>

a. Université Pierre et Marie Curie (Paris 06), Centre National de la Recherche Scientifique UMR7621, LOMIC, F-66651 Banyuls/Mer, France.

b Department of Parasitology, Faculty of Science, Charles University in Prague, Czech Republic.

c. Université Paris Diderot (Paris 07), Centre National de la Recherche Scientifique, Institut Jacques Monod, F-75013 Paris, France.

§ These authors contributed equally to this work

Correspondence should be sent to:

Emmanuel Lesuisse

Institut Jacques Monod, CNRS-Université Paris Diderot, Bât. Buffon, 15 rue Hélène Brion, 75205 Paris cedex 13, France.

Tel. +33 147 278 028

[lesuisse.emmanuel@ijm.univ-paris-diderot.fr](mailto:lesuisse.emmanuel@ijm.univ-paris-diderot.fr)

SUPP. Figure S1

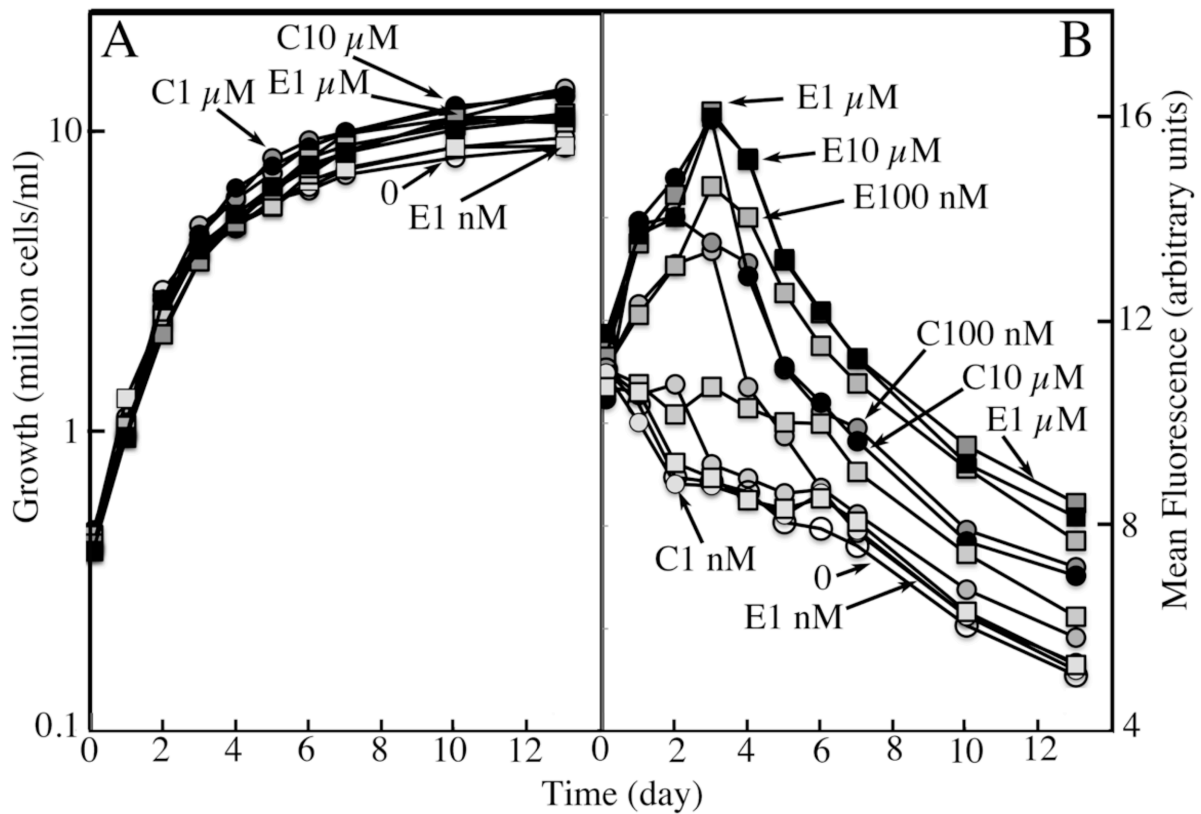

Figure S1. Iron-dependent growth (A) and iron-dependent chlorophyll fluorescence (B) of *P. tricornutum*. The cells were precultured for one week in iron-free medium and then inoculated in media containing 0-10  $\mu\text{M}$  ferric citrate (circles; C-Xn/ $\mu\text{M}$ ) or 0-10  $\mu\text{M}$  ferric EDTA (squares; E-Xn/ $\mu\text{M}$ ). The grey scale of symbols (from white to black) represents the increase in iron concentration from 0 to 10  $\mu\text{M}$ . The cells were grown under a 12:12 light-dark regime, and the number and fluorescence of cells was measured everyday by flow cytometry in the middle of the day. Data are from one representative experiment out of two independent experiments (see Table S1).

SUPP. Figure S2

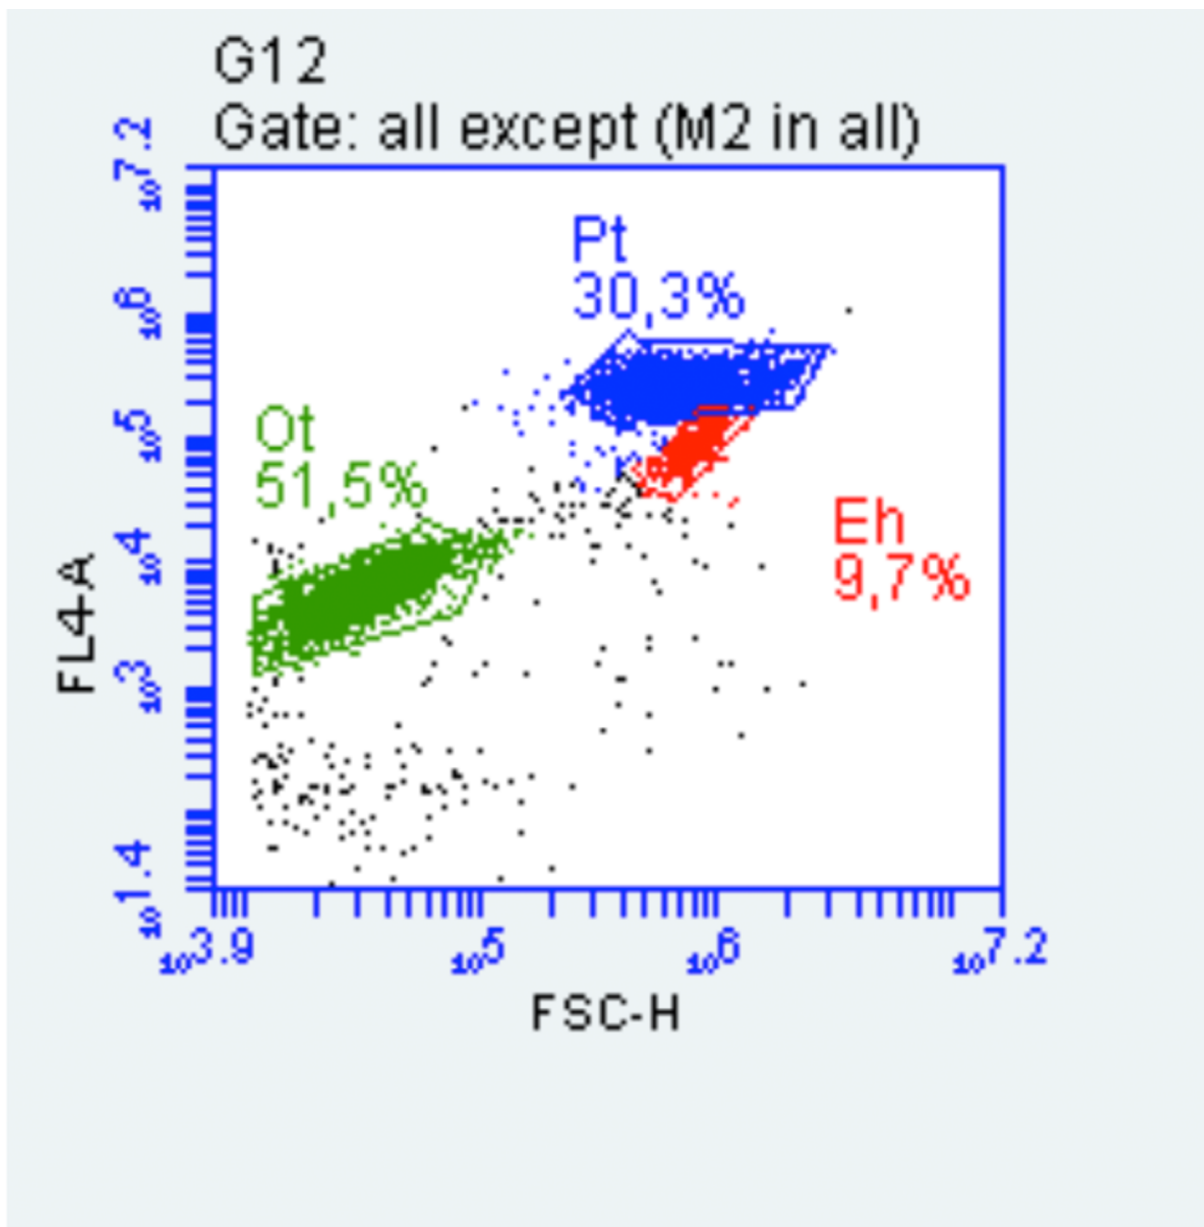

Figure S2. Identification of micro-algae populations by flow cytometry. Populations of *O. tauri* (Ot), *P. tricornutum* (Pt) and *E. huxleyi* (Eh) cells grown together were distinguished on the basis of differential cell fluorescence (FL4 channel: excitation 640 nm, emission 663-687 nm) and differential cell size (FSC-H).

SUPP. Figure S3

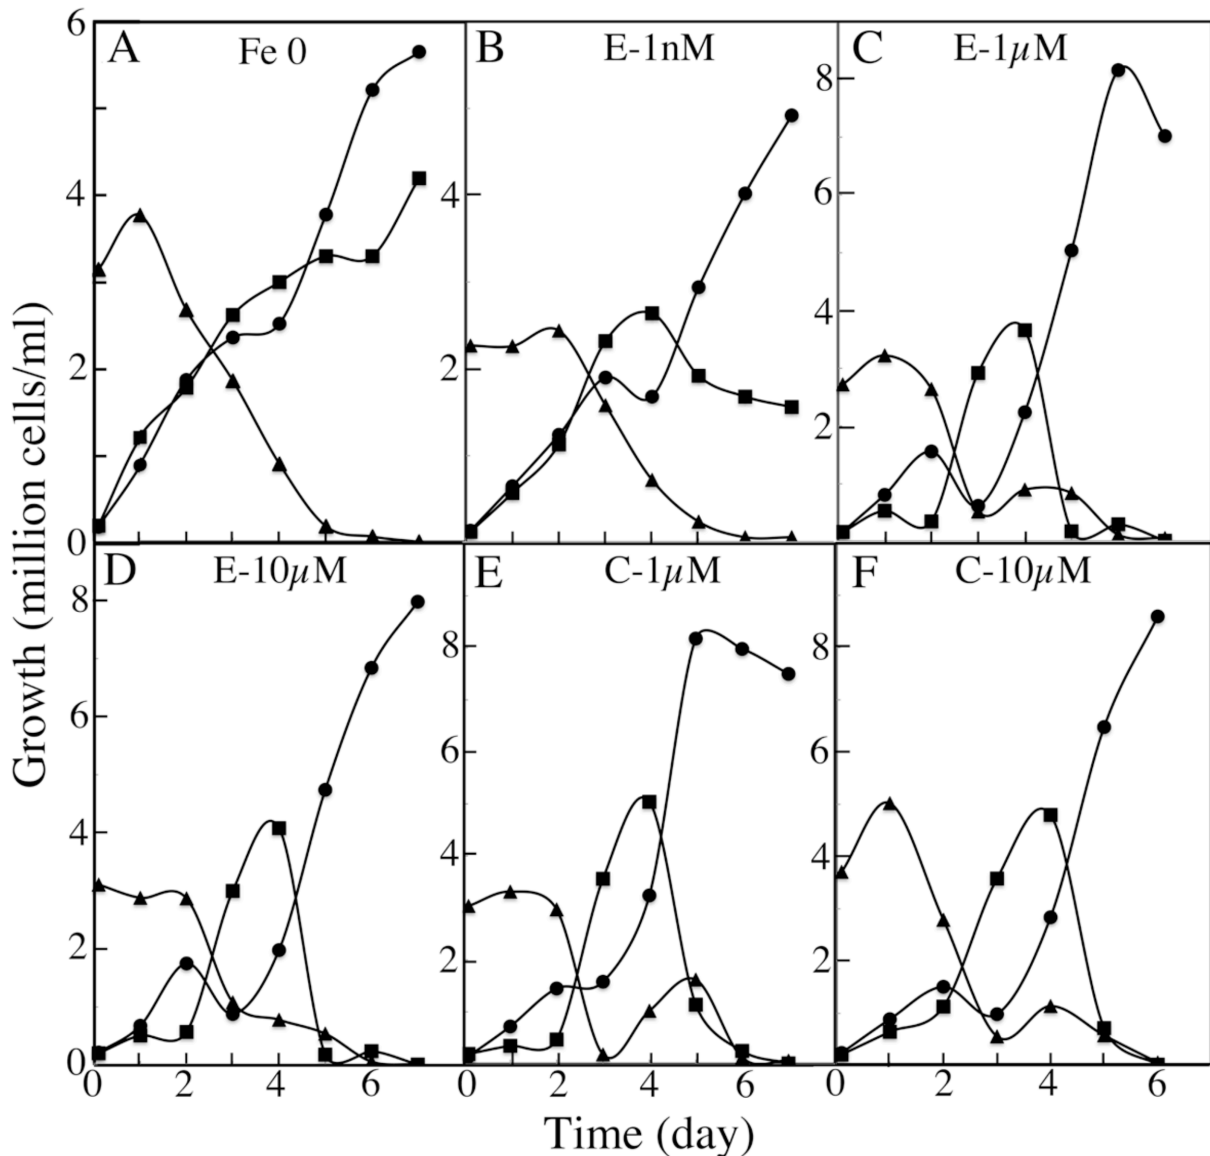

Figure S3. Effect of the concentration and source of iron on the growth of *O. tauri*, *E. huxleyi* and *P. tricornutum* (inter-specific competition). Cells of each species were grown separately for one week in iron-free medium and then inoculated together in media containing no iron (Fe 0) or different concentrations (1nM-10 μM) of ferric citrate (C-XnM) or ferric EDTA (E-XnM). The number of cells of each species in the inoculum was inversely proportional to the estimated value of the cell surface. The cells were grown under a 12:12 light-dark regime and the number of cells of each species was measured everyday by flow cytometry in the middle of the day. *O. tauri*: triangles; *E. huxleyi*: squares; *P. tricornutum*: circles. Data are from one representative experiment out of two independent experiments.

**SUPP. Figure S4**

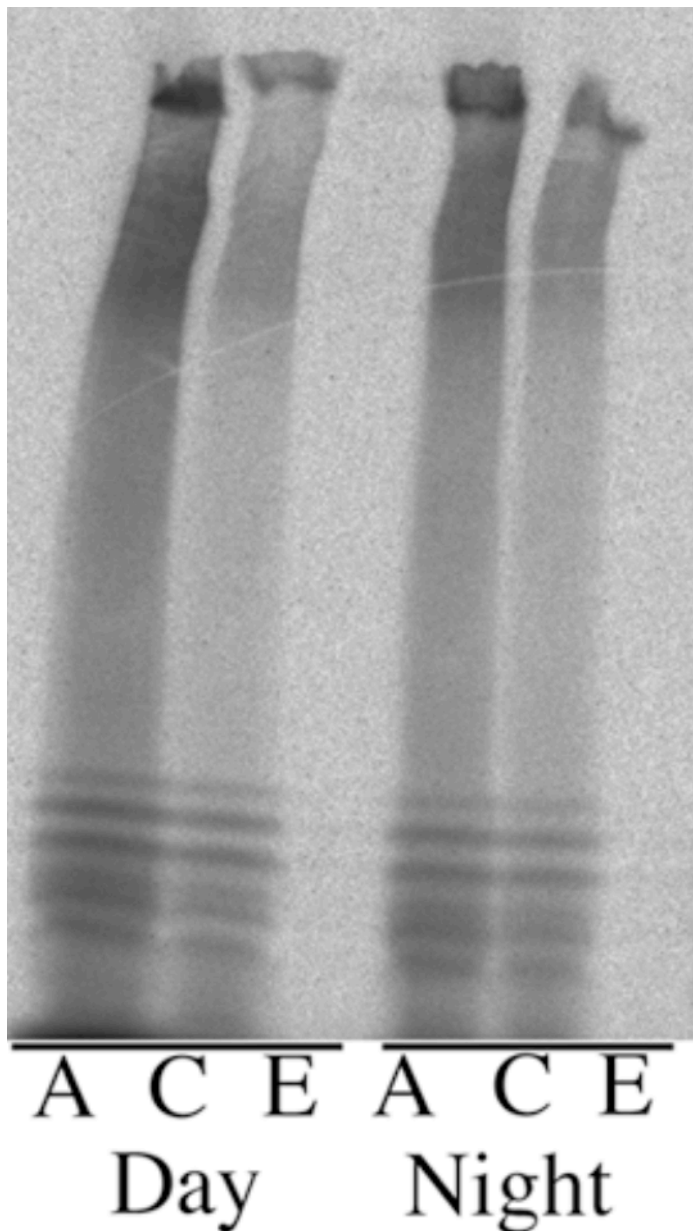

Figure S4. Effect of washing cells with strong iron chelators on bound iron. *E. huxleyi* cells were grown for five days under standard conditions (Mf medium + 0.1  $\mu\text{M}$  ferric citrate) and a 12:12 light-dark regime. Cells in exponential growth phase were harvested in the middle of the day (“Day”) or in the middle of the night (“Night”), washed once by centrifugation with iron-free Mf medium, and incubated in the same medium for 1.5 h in the light at 20°C with either 2  $\mu\text{M}$   $^{55}\text{Fe}$ ferrous ascorbate (1:100; “A”), 2  $\mu\text{M}$   $^{55}\text{Fe}$ ferric citrate (1:20; “C”) or 2  $\mu\text{M}$   $^{55}\text{Fe}$ ferric EDTA (1:20; “E”). Cells were then washed once with a medium containing strong iron chelators (see methods) and once with iron-free Mf medium. Whole cell extracts were prepared by sonication. After native PAGE (about 25  $\mu\text{g}$  protein per lane), the gels were dried and autoradiographed.

**SUPP. Table S1** (A) Mean and SE values (from three experiments) for cell growth and cell fluorescence (FL3) of *O. tauri* cultured with no iron (“0”) added and with 1 nM-10  $\mu$ M ferric citrate (“C-1nM-C-10 $\mu$ M”) and ferric EDTA (“E-1nM-E-10 $\mu$ M”). These values correspond to Figure 1. (B) Values (from one representative experiment) for cell growth and cell fluorescence (FL3) of *P. tricornutum* cultured with no iron added and with 1 nM-10  $\mu$ M ferric citrate or ferric EDTA. These values correspond to Figure S1. (C) Values (from one representative experiment) for cell growth and cell fluorescence (FL3) of *E. huxleyi* cultured with no iron added and with 1 nM-10  $\mu$ M ferric citrate or ferric EDTA.

**A. *Ostreococcus tauri*; growth (Cells/ $\mu$ l; mean)**

| Fe           | 0,00  | C1 nM | C10 nM | C100 nM | C1 $\mu$ M | C10 $\mu$ M | 0,00  | E1 nM | E10 nM | E100 nM | E1 $\mu$ M | E10 $\mu$ M |
|--------------|-------|-------|--------|---------|------------|-------------|-------|-------|--------|---------|------------|-------------|
| Time         | Ot1   | Ot2   | Ot3    | Ot4     | Ot5        | Ot6         | Ot7   | Ot8   | Ot9    | Ot10    | Ot11       | Ot12        |
| <b>0,01</b>  | 1444  | 1388  | 2812   | 2496    | 2220       | 2912        | 1448  | 1636  | 2360   | 3239    | 1760       | 2692        |
| <b>1,00</b>  | 3458  | 3968  | 4636   | 3306    | 4068       | 5082        | 1992  | 3030  | 2995   | 5344    | 3522       | 4296        |
| <b>2,00</b>  | 3440  | 4800  | 7890   | 8000    | 8560       | 6360        | 3740  | 4620  | 4975   | 8967    | 7000       | 10630       |
| <b>3,00</b>  | 7300  | 7340  | 13820  | 12800   | 15040      | 14620       | 6260  | 6960  | 8976   | 16311   | 12340      | 15700       |
| <b>4,00</b>  | 12240 | 15000 | 20100  | 25320   | 26220      | 31560       | 11760 | 13140 | 15231  | 29611   | 32400      | 36000       |
| <b>5,00</b>  | 11700 | 12600 | 29520  | 42320   | 47480      | 39660       | 10420 | 15840 | 21987  | 39452   | 67540      | 72870       |
| <b>6,00</b>  | 9840  | 9720  | 31660  | 48140   | 68540      | 83220       | 8395  | 12460 | 23340  | 53428   | 117780     | 138340      |
| <b>7,00</b>  | 9840  | 7800  | 28680  | 47660   | 98280      | 145635      | 5040  | 7500  | 21060  | 63485   | 137352     | 147960      |
| <b>10,00</b> | 2820  | 2160  | 4980   | 32660   | 58100      | 158320      | 1320  | 2760  | 8700   | 70450   | 93140      | 118440      |
| <b>13,00</b> | 900   | 660   | 1108   | 10480   | 26900      | 102800      | 660   | 480   | 2437   | 45345   | 65268      | 93340       |

*Ostreococcus tauri*; fluorescence (FL3; mean)

| Fe    | 0,00  | C1 nM | C10 nM | C100 nM | C1 µM | C10 µM | 0,00  | E1 nM | E10 nM | E100 nM | E1 µM | E10 µM |
|-------|-------|-------|--------|---------|-------|--------|-------|-------|--------|---------|-------|--------|
| Time  |       |       |        |         |       |        |       |       |        |         |       |        |
| 0,00  | 38484 | 38418 | 39654  | 39707   | 39248 | 37969  | 39411 | 38654 | 38675  | 36923   | 36694 | 38070  |
| 1,00  | 46835 | 47797 | 48946  | 47978   | 51860 | 47992  | 47904 | 47312 | 46987  | 47999   | 49749 | 51852  |
| 2,00  | 44639 | 46955 | 48345  | 49288   | 52360 | 48005  | 47705 | 47016 | 47234  | 49498   | 52241 | 51264  |
| 3,00  | 45200 | 45023 | 47012  | 48817   | 48469 | 49393  | 45437 | 46032 | 47127  | 49543   | 52219 | 53493  |
| 4,00  | 40442 | 41765 | 41649  | 46036   | 47127 | 48395  | 41608 | 41591 | 44569  | 48227   | 50060 | 51946  |
| 5,00  | 37802 | 37882 | 38234  | 39345   | 42644 | 47175  | 37791 | 38133 | 41890  | 46456   | 48059 | 51146  |
| 6,00  | 35808 | 36628 | 36987  | 38851   | 41691 | 47143  | 34798 | 34505 | 39123  | 45851   | 47547 | 50820  |
| 7,00  | 35926 | 36384 | 35765  | 37154   | 40257 | 46262  | 34874 | 34264 | 38345  | 43403   | 45041 | 49445  |
| 10,00 | 31033 | 32222 | 33976  | 35148   | 32934 | 38782  | 32015 | 32269 | 36013  | 38791   | 42567 | 44996  |
| 13,00 | 26154 | 27093 | 30123  | 30268   | 31307 | 33974  | 26768 | 31438 | 31268  | 36392   | 38538 | 38972  |

*Ostreococcus tauri*; growth (Cells/ $\mu$ l; SE from 3 experiments)

| Fe         | 0    | C-1nM | C-10 nM | C-100 nM | C-1 $\mu$ M | C-10 $\mu$ M | 0    | E-1nM | E-10nM | E-100nM | E-1 $\mu$ M | E-10 $\mu$ M |
|------------|------|-------|---------|----------|-------------|--------------|------|-------|--------|---------|-------------|--------------|
| Time (day) |      |       |         |          |             |              |      |       |        |         |             |              |
| 0          | 21   | 56    | 69      | 78       | 69          | 96           | 26   | 51    | 96     | 123     | 89          | 121          |
| 1          | 259  | 359   | 257     | 235      | 389         | 387          | 123  | 236   | 425    | 365     | 159         | 286          |
| 2          | 235  | 342   | 652     | 458      | 826         | 524          | 285  | 298   | 589    | 523     | 526         | 895          |
| 3          | 489  | 725   | 1325    | 1101     | 1789        | 965          | 356  | 524   | 813    | 1128    | 869         | 1259         |
| 4          | 1125 | 1235  | 1456    | 1394     | 2196        | 2563         | 1325 | 968   | 1596   | 2547    | 1986        | 3002         |
| 5          | 1023 | 1123  | 2563    | 3940     | 3210        | 2964         | 1358 | 1489  | 2169   | 2897    | 3654        | 4589         |
| 6          | 589  | 895   | 3022    | 3987     | 3529        | 5248         | 563  | 925   | 1978   | 3258    | 6986        | 6528         |
| 7          | 943  | 742   | 2159    | 3869     | 5698        | 9563         | 356  | 521   | 1965   | 3869    | 10698       | 9658         |
| 10         | 221  | 205   | 426     | 3001     | 2285        | 11269        | 51   | 231   | 543    | 5321    | 6985        | 9658         |
| 13         | 75   | 85    | 124     | 489      | 1243        | 5624         | 53   | 25    | 71     | 1283    | 3269        | 3589         |

*Ostreococcus tauri*; fluorescence (FL3; SE from 3 experiments)

| Fe         | 0    | C-1nM | C-10 nM | C-100 nM | C-1 $\mu$ M | C-10 $\mu$ M | 0    | E-1nM | E-10nM | E-100nM | E-1 $\mu$ M | E-10 $\mu$ M |
|------------|------|-------|---------|----------|-------------|--------------|------|-------|--------|---------|-------------|--------------|
| Time (day) |      |       |         |          |             |              |      |       |        |         |             |              |
| 0          | 3569 | 3987  | 3658    | 2968     | 2569        | 1356         | 2506 | 2690  | 3698   | 1962    | 1952        | 2569         |
| 1          | 4236 | 5269  | 5429    | 4563     | 4322        | 3287         | 1962 | 4369  | 3965   | 5002    | 3245        | 3951         |
| 2          | 3256 | 5432  | 5123    | 4022     | 5694        | 4962         | 5126 | 4760  | 5249   | 5460    | 5036        | 5021         |
| 3          | 2695 | 1235  | 4198    | 5063     | 3188        | 3941         | 2964 | 3964  | 4022   | 3612    | 3901        | 4972         |
| 4          | 4123 | 3256  | 3985    | 3399     | 4821        | 5236         | 3005 | 4001  | 3956   | 2587    | 4962        | 5752         |
| 5          | 3695 | 3896  | 2273    | 3973     | 3970        | 2976         | 2968 | 1952  | 4326   | 3687    | 3078        | 2976         |
| 6          | 4125 | 3573  | 4322    | 3978     | 2321        | 3332         | 3002 | 3201  | 2290   | 4026    | 2263        | 4832         |
| 7          | 3256 | 4102  | 4369    | 4102     | 1698        | 2956         | 3521 | 3652  | 3271   | 4196    | 3786        | 3915         |
| 10         | 1452 | 3269  | 2289    | 2975     | 1976        | 3075         | 2970 | 3412  | 1596   | 3702    | 2368        | 4096         |
| 13         | 1963 | 1429  | 1398    | 1965     | 2356        | 1256         | 1496 | 1369  | 936    | 1873    | 1962        | 2023         |



***B. Pheodactylum tricornutum*; growth (Cells/ $\mu$ l; from 1 representative experiment)**

| <b>Fe</b>         | <b>0</b> | <b>C-1nM</b> | <b>C-10 nM</b> | <b>C-100 nM</b> | <b>C-1<math>\mu</math>M</b> | <b>C-10<math>\mu</math>M</b> | <b>0</b> | <b>E-1nM</b> | <b>E-10nM</b> | <b>E-100nM</b> | <b>E-1<math>\mu</math>M</b> | <b>E-10<math>\mu</math>M</b> |
|-------------------|----------|--------------|----------------|-----------------|-----------------------------|------------------------------|----------|--------------|---------------|----------------|-----------------------------|------------------------------|
| <b>Time (day)</b> |          |              |                |                 |                             |                              |          |              |               |                |                             |                              |
| <b>0</b>          | 400      | 412          | 414            | 410             | 424                         | 472                          | 380      | 456          | 400           | 452            | 424                         | 402                          |
| <b>1</b>          | 986      | 975          | 1002           | 1120            | 985                         | 1080                         | 986      | 1296         | 1005          | 1050           | 958                         | 966                          |
| <b>2</b>          | 2863     | 2980         | 2610           | 2770            | 2390                        | 2600                         | 2520     | 2470         | 2400          | 2200           | 2120                        | 2770                         |
| <b>3</b>          | 3968     | 4280         | 4200           | 4896            | 4560                        | 4540                         | 4580     | 4060         | 4120          | 3740           | 3720                        | 4060                         |
| <b>4</b>          | 4800     | 4862         | 5220           | 5986            | 6060                        | 6540                         | 4620     | 4920         | 5040          | 5100           | 4980                        | 5340                         |
| <b>5</b>          | 5962     | 5923         | 6180           | 7325            | 8220                        | 7740                         | 5940     | 5640         | 5700          | 6480           | 6420                        | 6600                         |
| <b>6</b>          | 6423     | 6596         | 8160           | 9002            | 9420                        | 8962                         | 6960     | 6900         | 7260          | 8220           | 7620                        | 7800                         |
| <b>7</b>          | 7236     | 7523         | 9900           | 9965            | 10040                       | 9952                         | 8460     | 7625         | 8700          | 9060           | 8580                        | 8580                         |
| <b>10</b>         | 8261     | 8950         | 11180          | 11940           | 12260                       | 12235                        | 11220    | 8950         | 10980         | 10569          | 11235                       | 10235                        |
| <b>13</b>         | 8931     | 9625         | 13760          | 14040           | 13260                       | 13300                        | 14100    | 9021         | 10820         | 11580          | 11280                       | 11256                        |

*Pheodactylum tricornutum*; fluorescence (FL3; from 1 representative experiment)

| Fe                | 0       | C-1nM   | C-10 nM | C-100 nM | C-1 $\mu$ M | C-10 $\mu$ M | 0       | E-1nM   | E-10nM  | E-100nM | E-1 $\mu$ M | E-10 $\mu$ M |
|-------------------|---------|---------|---------|----------|-------------|--------------|---------|---------|---------|---------|-------------|--------------|
| <b>Time (day)</b> |         |         |         |          |             |              |         |         |         |         |             |              |
| <b>0</b>          | 1104526 | 1097515 | 1105827 | 1106471  | 1143635     | 1046812      | 1070026 | 1097421 | 1104734 | 1107853 | 1129314     | 1174758      |
| <b>1</b>          | 1036448 | 1001272 | 1054977 | 1231102  | 1386549     | 1393117      | 1060261 | 1072807 | 1075883 | 1210801 | 1349941     | 1366500      |
| <b>2</b>          | 894786  | 881402  | 1075624 | 1309364  | 1401649     | 1476961      | 922642  | 917628  | 1017030 | 1306165 | 1444279     | 1400395      |
| <b>3</b>          | 885691  | 878331  | 919856  | 1335107  | 1351265     | 1591214      | 893559  | 906296  | 1070483 | 1460924 | 1606230     | 1595180      |
| <b>4</b>          | 865970  | 854879  | 892804  | 1070131  | 1311245     | 1285950      | 850140  | 887056  | 1029246 | 1400371 | 1512615     | 1516131      |
| <b>5</b>          | 807059  | 821361  | 863462  | 974748   | 1104664     | 1110196      | 833556  | 848986  | 1001554 | 1253424 | 1316685     | 1320259      |
| <b>6</b>          | 794639  | 863889  | 870748  | 874002   | 1022254     | 1040097      | 853697  | 896842  | 998987  | 1150421 | 1214198     | 1218656      |
| <b>7</b>          | 761007  | 791584  | 786765  | 822567   | 990518      | 964825       | 808354  | 854453  | 905168  | 1077281 | 1126508     | 1123308      |
| <b>10</b>         | 606180  | 624752  | 624561  | 676096   | 792261      | 769793       | 632965  | 669558  | 745785  | 911939  | 955873      | 920897       |
| <b>13</b>         | 509174  | 519068  | 533128  | 582848   | 719757      | 702932       | 529514  | 563913  | 623466  | 771094  | 844288      | 817343       |

*C. Emiliana huxleyi*; growth (Cells/ $\mu$ l); from 1 representative experiment)

| Fe<br>Time (day) | 0    | C-1nM | C-10 nM | C-100 nM | C-1 $\mu$ M | C-10 $\mu$ M | 0     | E-1nM | E-10nM | E-100nM | E-1 $\mu$ M | E-10 $\mu$ M |
|------------------|------|-------|---------|----------|-------------|--------------|-------|-------|--------|---------|-------------|--------------|
| 0                | 400  | 412   | 414     | 410      | 424         | 472          | 380   | 456   | 400    | 452     | 424         | 402          |
| 1                | 986  | 975   | 1002    | 1120     | 985         | 1080         | 986   | 1296  | 1005   | 1050    | 958         | 966          |
| 2                | 2863 | 2980  | 2610    | 2770     | 2390        | 2600         | 2520  | 2470  | 2400   | 2200    | 2120        | 2770         |
| 3                | 3968 | 4280  | 4200    | 4896     | 4560        | 4540         | 4580  | 4060  | 4120   | 3740    | 3720        | 4060         |
| 4                | 4800 | 4862  | 5220    | 5986     | 6060        | 6540         | 4620  | 4920  | 5040   | 5100    | 4980        | 5340         |
| 5                | 5962 | 5923  | 6180    | 7325     | 8220        | 7740         | 5940  | 5640  | 5700   | 6480    | 6420        | 6600         |
| 6                | 6423 | 6596  | 8160    | 9002     | 9420        | 8962         | 6960  | 6900  | 7260   | 8220    | 7620        | 7800         |
| 7                | 7236 | 7523  | 9900    | 9965     | 10040       | 9952         | 8460  | 7625  | 8700   | 9060    | 8580        | 8580         |
| 10               | 8261 | 8950  | 11180   | 11940    | 12260       | 12235        | 11220 | 8950  | 10980  | 10569   | 11235       | 10235        |
| 13               | 8931 | 9625  | 13760   | 14040    | 13260       | 13300        | 14100 | 9021  | 10820  | 11580   | 11280       | 11256        |

*Emiliana huxleyi*; fluorescence (FL3 X 10<sup>-3</sup>; from 1 representative experiment)

| Fe         | 0    | C-1nM | C-10 nM | C-100 nM | C-1μM | C-10μM | 0    | E-1nM | E-10nM | E-100nM | E-1μM | E-10μM |
|------------|------|-------|---------|----------|-------|--------|------|-------|--------|---------|-------|--------|
| Time (day) |      |       |         |          |       |        |      |       |        |         |       |        |
| <b>0</b>   | 1105 | 1098  | 1106    | 1106     | 1144  | 1047   | 1070 | 1097  | 1105   | 1108    | 1129  | 1175   |
| <b>1</b>   | 1036 | 1001  | 1055    | 1231     | 1387  | 1393   | 1060 | 1073  | 1076   | 1211    | 1350  | 1366   |
| <b>2</b>   | 895  | 881   | 1076    | 1309     | 1402  | 1477   | 923  | 918   | 1017   | 1306    | 1444  | 1400   |
| <b>3</b>   | 886  | 878   | 920     | 1335     | 1351  | 1591   | 894  | 906   | 1070   | 1461    | 1606  | 1595   |
| <b>4</b>   | 866  | 855   | 893     | 1070     | 1311  | 1286   | 850  | 887   | 1029   | 1400    | 1513  | 1516   |
| <b>5</b>   | 807  | 821   | 863     | 975      | 1105  | 1110   | 834  | 849   | 1002   | 1253    | 1317  | 1320   |
| <b>6</b>   | 795  | 864   | 871     | 874      | 1022  | 1040   | 854  | 897   | 999    | 1150    | 1214  | 1219   |
| <b>7</b>   | 761  | 792   | 787     | 823      | 991   | 965    | 808  | 854   | 905    | 1077    | 1127  | 1123   |
| <b>10</b>  | 606  | 625   | 625     | 676      | 792   | 770    | 633  | 670   | 746    | 912     | 956   | 921    |
| <b>13</b>  | 509  | 519   | 533     | 583      | 720   | 703    | 530  | 564   | 623    | 771     | 844   | 817    |
